# Supplementary material for: Demographic compensation occurs in populations of Quercus oleoides Schltdl & Cham in fragments across an altitudinal gradient
Source: PeerJ. 2025 Feb 24;13:e18980. doi: 10.7717/peerj.18980 (PMC11867044; doi:10.7717/peerj.18980)
Supplement: Supplemental Information 2 [file peerj-13-18980-s002.xlsx]

## Sheet: Miramar
Plot 1														Plot 2														Plot 3														Plot 4
	2016-11-01				2017-11-01				2018-11-01						2016-11-01				2017-11-01				2018-11-01						2016-11-01				2017-11-01				2018-11-01						2016-11-01				2017-11-01
No.	DAP	ALT	CD		DAP	ALT	CD		DAP	ALT	CD			No.	DAP	ALT	CD		DAP	ALT	CD		DAP	ALT	CD			No.	DAP	ALT	CD		DAP	ALT	CD		DAP	ALT	CD			No.	DAP	ALT	CD		DAP	ALT	CD
1	31	9	5		34.5	12	5		35	12	5			1	13	5	3		15.5	8	3		18	9	3			1	34	15	5		37	15	5		39	15	5			1	4	6	2		5.5	6	2
2	0.5	1	1		1	1	2		5	2	2			2	15	6	3		18	10	3		21	10	4			2	15	12	3		17.5	12	3		21	14	4			2	26	14	4		29	14	4
3	0.5	0.9	1		*	*	*		*	*	*			3	5	3	2		7	5	2		10	6	2			3	26	14	3		28	14	4		32	15	5			3	20	12	3		22.5	12	4
4	0.5	0.5	1		1	1	2		6	2	2			4	3	2	2		5	4	2		7	5	2			4	0.5	0.8	1		2	3	2		5	5	2			4	7	3	2		7.5	4	2
5	10	7	2		13	5	3		18	6	3			5	12	9	3		15.5	10	3		18	12	3			5	0.6	0.8	1		0.9	2	1		2	3	2			5	6	6	2		9	7	2
6	32	10	5		33.5	12	5		38	13	5			6	0.9	1	1		4	2	2		6	3	2			6	0.6	0.9	1		0.9	1.5	1		2	3	2			6	0.7	0.8	1		*	*	*
7	23	10	4		25.5	8	4		31	10	5			7	0.9	1	1		3	2	2		*	*	*			7	11	7	3		*	*	*		*	*	*			7	0.8	0.8	1		*	*	*
8	25	11	4		26.5	9	4		*	*	*			8	0.6	0.9	1		3	2	2		5	2	2			8	27	14	4		31.5	15	5		35	15	5			8	0.9	0.9	1		2	2	2
9	0.5	1	1		1	1	2		6	2	2			9	0.5	0.7	1		3	2	2		4	2	2			9	20	13	3		22	13	4		24	13	4			9	0.6	0.5	1		*	*	*
10	36	12	5		37.5	13	5		42	14	6			10	20	10	3		23.5	10	4		25	11	4			10	23	10	4		23.5	11	4		25	11	4			10	3	4	2		5.5	5	2
11	0.5	0.9	1		*	*	*		*	*	*			11	30	12	4		32	12	5		35	12	5			11	26	12	4		29	12	4		32	13	5			11	0.5	0.6	1		1	1	2
12	36	12	5		38.5	13	5		41	14	6			12	2	4	2		*	*	*		*	*	*			12	24	13	4		27	13	4		29	13	4			12	4	4	2		5.5	4	2
13	12	6	3		15.5	5	3		19	6	3			13	2	4	2		4	4	2		6	5	2			13	0.9	1	1		2	2	2		4	3	2			13	23	12	4		27	12	4
14	35	11	5		36.5	12	5		40	13	5			14	0.9	1	1		3	2	2		7	6	2			14	0.5	0.5	1		1	2	2		4	3	2			14	7	6	2		9	8	2
15	19	7	3		22	7	4		24	8	4			15	0.9	0.8	1		4	4	2		7	6	2			15	11	8	3		14	8	3		19	10	3			15	25	13	4		27	13	4
16	37	10	5		37.5	13	5		42	14	6			16	0.9	0.8	1		3	3	2		6	6	2			16	16	9	3		18	9	3		21	10	4			16	26	11	4		26	12	4
17	1.7	2	2		3	1	2		6	2	2			17	0.5	0.5	1		4	3	2		6	5	2			17	23	10	4		25	10	4		26	10	4			17	11	5	3		*	*	*
18	1.5	2	2		3	2	2		7.5	3	2			18	0.5	0.5	1		3	3	2		6	4	2			18	7	8	1		9	8	1		14	9	3			18	20	12	3		22.5	12	4
19	0.9	1.5	1		2	1	2		5	2	2			19	0.9	1	1		5	4	2		7	5	2			19	19	10	3		21.5	10	4		24	12	4			19	12	5	3		13.5	8	3
20	0.8	1.5	1		2	1	2		5	2	2			20	0.8	0.9	1		4	4	2		5	5	2			20	0.5	0.7	1		0.9	1	1		1.5	2	2			20	23	10	4		26	12	4
21	0.6	1	1		0.9	1	1		3	2	2			21	17	8	3		20	8	3		25	9	4			21	0.5	0.5	1		0.8	1	1		2	3	2			21	3	4	2		4.5	4	2
22	0.8	1.5	1		1	1	2		3	2	2			22	17	9	3		19	8	3		21	8	4			22	0.5	0.5	1		*	*	*		*	*	*			22	9	7	2		15	8	3
23	0.8	1.5	1		1	1	2		*	*	*			23	13	7	3		15.5	8	3		19	9	3			23	0.6	0.6	1		1	1	2		3	2	2			23	6	5	2		8.5	7	2
24	0.4	1	1		0.9	1	1		3.5	2	2			24	1	1	2		3	3	2		7	5	2			24	6	6	2		8	8	2		11	8	3			24	24	12	4		26.5	12	4
25	0.9	1.5	1		1	1	2		4	2	2			25	1	1	2		3	3	2		6	5	2			25	23	11	4		25	11	4		27	12	4			25	27	12	4		28.5	12	4
26	0.5	1	1		0.9	1	1		4	2	2			26	17	7	3		21	8	4		22	8	4			26	14	9	3		15.5	9	3		17	9	3			26	19	9	3		19	10	3
27	0.6	1	1		0.9	1	1		3	2	2			27	4	5	2		7	5	2		11	7	3			27	21	9	4		22.5	9	4		24.5	10	4			27	19	10	3		19	10	3
28	0.9	1.5	1		1	1	2		4	2	2			28	2	4	2		5	5	2		7	6	2			28	26	11	4		28	11	4		31	11	5			28	2	3	2		4	3	2
29	7	5	2		*	*	*		*	*	*			29	3	5	2		5.5	5	2		8	6	2			29	7	5	2		9	5	2		10	5	2			29	2	3	2		4	3	2
30	5	4	2		*	*	*		*	*	*			30	0.7	0.8	1		3	3	2		5	5	2			30	9	7	2		10	8	2		10	8	2			30	29	12	4		31	12	5
31	5	3	2		*	*	*		*	*	*			31	0.9	1	1		3	3	2		7	6	2			31	5	4	2		7	5	2		8	6	2			31	0.8	1	1		2	2	2
32	6	5	2		*	*	*		*	*	*			32	0.9	1	1		4	4	2		8	6	2			32	7	5	2		8	6	2		*	*	*			32	0.9	1	1		3	2	2
33					0.5	1	1		1.5	1	2			33	0.6	0.5	1		3	4	2		5	5	2			33	7	6	2		*	*	*		*	*	*			33	0.9	1	1		2	2	2
34					0.5	1	1		2	2	2			34	0.5	0.6	1		3	3	2		5	5	2			34	7	5	2		*	*	*		*	*	*			34	0.9	0.9	1		2	2	2
35					0.5	1	1		2	2	2			35	18	12	3		21	12	4		26	14	4			35									0.5	0.7	1			35	1	3	2		2	4	2
36					0.5	1	1		*	*	*			36	2	3	2		2.5	3	2		4	4	2			36									0.7	0.9	1			36	2	3	2		3	3	2
37					0.5	1	1		4	2	2			37	12	9	3		13.5	10	3		14	10	3			37									0.7	0.9	1			37	5	6	2		7	6	2
38					0.5	1	1		*	*	*			38	5	3	2		7.5	5	2		11	8	3																	38	2	3	2		4	4	2
39					0.8	1	1		0.8	1	1			39	28	13	4		30	13	4		32.5	14	5				34				30				32					39	16	8	3		19	8	3
40					0.8	1	1		0.6	1	1			40	26	9	2		28.5	10	4		31	10	5																	40	34	13	5		37	13	5
41					0.8	1	1		0.5	1	1			41	17	8	3		17.5	8	3		22	10	4																	41	5	6	2		8	7	2
42					0.7	1	1		0.5	1	1			42	26	9	4		28	9	4		31	10	5																	42	5	6	2		7	7	2
43					0.7	1	1		0.5	1	1			43	21	9	4		21.5	9	4		24	10	4																	43	19	10	3		23	12	4
44					0.8	1	1		0.5	1	1			44	14	5	3		17	7	3		19	7	3																	44	26	12	4		28	12	4
45					0.7	1	1		0.5	1	1			45	2	3	2		3	3	2		6	5	2																	45	2	3	2		4.5	4	2
46					0.7	1	1		0.5	1	1			46	20	10	3		23	10	4		25	11	4																	46	9	6	2		12	7	3
47					0.5	1	1		0.5	1	1			47	20	10	3		22	10	4		26	12	4																	47	6	6	2		*	*	*
48									0.5	1	1			48	14	7	3		17.5	8	3		22	9	4																	48	16	8	3		19	8	3
49									0.5	1	1			49	12	7	3		14.5	8	3		16	8	3																	49	0.8	1	1		1	1.2	1
50									0.5	1	1			50	0.5	0.5	1		3	3	2		7	5	2																	50	0.8	1	1		1.2	2	1
51									0.5	1	1			51	0.5	0.6	1		3	3	2		6	5	2																	51	0.5	1	1		0.8	1	1
52									0.5	1	1			52	0.7	0.8	1		4	3	2		7	5	2																	52	0.5		1		1	2	2
53									0.5	1	1			53	0.9	0.9	1		4	4	2		7	5	2																	53	0.5		1		1.2	2	2
54									0.5	1	1			54	6	5	2		9	6	2		11	7	3																	54	0.5		1		2	2	2
55									0.5	1	1			55	6	6	2		8.5	6	2		12	8	3																	55	0.7		1		2	2	2
														56	2	4	2		3.5	4	2		6	5	2																	56	0.7		1		1.3	2	2
	32				41				45					57	6	5	2		7.5	6	2		11	8	3																	57	0.8		1		2	3	2
														58	7	6	2		9	7	2		12	8	3																	58	0.6		1		2	2	2
														59	5	6	2		7	6	2		*	*	*																	59	0.6		1		1.2	2	2
														60	6	6	2		8.5	7	2		12	9	3																	60	0.6		1		0.9	2	1
														61	24	7	2		27.5	7	4		33	9	5																	61					0.6	1	1
														62	6	6	2		8.5	6	2		11	8	3																	62					0.8	1.2	1
														63	5	3	2		6	3	2		7	4	2																	63					0.7	1	1
														64	6	6	2		*	*	*		*	*	*																	64					0.7	1	1
														65	20	11	3		21.5	11	4		24	12	4																	65					0.7	1	1
														66	2	3	2		4	5	2		*	*	*																	66					0.6	1	1
														67	15	9	3		*	*	*		*	*	*																	67					0.6	1	1
														68					0.6	1	1		3	3	2																	68					0.6	1	1
														69					0.6	0.8	1		2	3	2																	69
														70					0.6	1	1		1.8	2	2																	70
														71					0.5	1	1		0.8	1.2	1																	71
														72					0.6	1.2	1		3	3	2																	72
														73					0.5	1	1		1	2	2																	73
														74					0.5	1	1		2	3	2																	74
														75					0.5	0.9	1		0.9	2	2																	75
														76					0.5	1	1		1.3	2	2																	76
														77					0.5	1	1		1	2	2
														78					0.5	0.9	1		1.2	2	2																		60				63
														79					0.5	1	1		0.8	1	1
														80					0.5	1	1		0.8	1	1
														81					0.5	1	1		1	2	2
														82					0.5	1.1	1		1	2	2
														83					0.5	1	1		1	1.8	2
														84					0.5	1	1		1	2	2
														85									0.5	0.9	1
														86									0.5	1.2	1
															67				81				80

## Sheet: Mesa de Veinticuatro
Plot 1														Plot 2														Plot 3														Plot 4
	2016-11-01				2017-11-01				2018-11-01						2016-11-01				2017-11-01				2018-11-01						2016-11-01				2017-11-01				2018-11-01						2016-11-01				2017-11-01
No.	DAP	ALT	CD		DAP	ALT	CD		DAP	ALT	CD			No.	DAP	ALT	CD		DAP	ALT	CD		DAP	ALT	CD			No.	DAP	ALT	CD		DAP	ALT	CD		DAP	ALT	CD			No.	DAP	ALT	CD		DAP	ALT	CD
1	40	7	5		42	7	6		43	7	6			1	26	6	4		27	6	4		30	7	4			1	37	7	5		39	8	5		40	8	5			1	40	7	5		41	8	6
2	26	6	4		*	*	*		*	*	*			2	12	6	3		*	*	*		*	*	*			2	15	5	3		18	6	3		22	7	4			2	26	6	4		28	7	4
3	15	5	3		16.5	6	3		18	6	3			3	18	7	3		21	8	4		25	9	4			3	11	5	3		13	6	3		16	6	3			3	15	5	3		19	6	3
4	12	6	3		17	6	3		19	7	3			4	20	8	3		22	9	4		25	9	4			4	24	7	4		26	8	4		27	8	4			4	0.5	1	1		1	1	2
5	0.9	2	1		2	3	2		5	3	2			5	17	7	3		18	7	3		22	8	4			5	21	6	4		24	7	4		28	8	4			5	11	5	3		14	6	3
6	18	7	3		21	8	4		22	8	4			6	21	7	4		*	*	*		*	*	*			6	15	6	3		19	7	3		22	8	4			6	18	7	3		21	7	4
7	20	8	3		26	9	4		29	9	4			7	32	9	5		35	10	5		37	10	5			7	21	6	4		23	6	4		26	7	4			7	24	7	4		27	8	4
8	17	7	3		21	8	4		23	8	4			8	40	10	5		42	11	6		43	11	6			8	15	6	3		17	7	3		19	8	3			8	20	8	3		24	9	4
9	15	6	3		*	*	*		*	*	*			9	14	6	3		17	7	3		19	7	3			9	11	5	3		*	*	*		*	*	*			9	21	6	4		24	7	4
10	21	7	4		24	8	4		27	8	4			10	16	6	3		19	7	3		21	8	4			10	26	10	4		28	10	4		32	11	5			10	17	7	3		21	8	4
11	32	9	5		34	10	5		37	10	5			11	25	9	4		26	9	4		29	10	4			11	9	4	2		12	5	3		16	6	3			11	15	6	3		18	7	3
12	15	6	3		19	7	3		24	8	4			12	28	9	4		31	10	5		33	10	5			12	15	6	3		18	7	3		23	8	4			12	0.8	7	1		*	*	*
13	40	10	5		43	10	6		45	10	6			13	12	4	3		13	4	3		16	5	3			13	39	9	5		42	9	6		45	10	6			13	21	6	4		24	7	4
14	11	5	3		15	6	3		16	6	3			14	43	9	6		44	10	6		44	10	6			14	9	3	2		*	*	*		*	*	*			14	32	9	5		33	9	5
15	14	6	3		17	7	3		19	7	3			15	10	4	2		13	5	3		17	6	3			15	12	4	3		15	5	3		19	6	3			15	15	6	3		19	7	3
16	16	6	3		18	7	3		21	8	4			16	14	5	3		17	6	3		19	6	3			16	16	6	3		18	7	3		21	8	4			16	40	10	5		40	10	5
17	9	4	2		14	7	3		16	7	3			17	17	5	3		19	6	3		21	7	4			17	13	5	3		16	6	3		19	7	3			17	11	5	3		14	6	3
18	25	9	4		*	*	*		*	*	*			18	14	5	3		17	6	3		19	6	3			18	9	4	2		12	5	3		16	6	3			18	14	6	3		18	7	3
19	15	6	3		19	7	3		22	7	4			19	18	7	3		21	8	4		23	9	4			19	19	6	3		23	7	4		27	8	4			19	26	10	4		29	11	4
20	39	9	5		41	10	6		45	10	6			20	17	6	3		19	7	3		21	8	4			20	18	7	3		22	8	4		25	9	4			20	16	6	3		20	7	3
21	12	4	3		15	5	3		19	7	3			21	0.5	10	1		*	*	*		*	*	*			21	36	9	5		37	9	5		39	10	5			21	8	4	2		12	5	3
22	9	3	2		14	5	3		16	5	3			22	0.7	6	1		*	*	*		*	*	*			22	9	4	2		13	5	3		16	6	3			22	25	9	4		28	10	4
23	43	9	6		45	9	6		49	9	6			23	14	5	3		17	6	3		19	6	3			23	16	7	3		19	8	3		21	8	4			23	15	6	3		17	7	3
24	12	4	3		14	5	3		15	5	3			24	24	8	4		27	8	4		29	9	4			24	18	6	3		22	7	4		25	8	4			24	28	9	4		31	9	5
25	10	4	2		15	6	3		18	6	3			25	0.9	2	1		1	2	2		2	2	2			25	18	6	3		19	6	3		22	7	4			25	39	9	5		40	10	5
26	16	6	3		19	6	3		21	6	4			26	15	4	3		17	5	3		19	5	3			26	12	3	3		15	4	3		19	5	3			26	12	4	3		15	5	3
27	14	5	3		15	5	3		19	6	3			27	11	4	3		*	*	*		*	*	*			27	43	10	6		44	11	6		44	11	6			27	9	3	2		12	4	3
28	13	5	3		16	6	3		18	6	3			28	16	7	3		18	7	3		21	8	4			28	11	4	3		15	5	3		17	5	3			28	41	9	6		41	9	6
29	17	5	3		21	6	4		23	6	4			29	23	8	4		25	8	4		29	9	4			29	33	9	5		35	10	5		36	10	5			29	12	4	3		15	5	3
30	0.9	2	1		2	3	2		7	4	2			30	26	7	4		28	7	4		31	8	5			30	11	3	3		14	4	3		17	5	3			30	9	4	2		13	5	3
31	14	5	3		15	5	3		18	6	3			31	12	4	3		15	5	3		19	6	3			31	22	7	4		26	8	4		29	9	4			31	16	6	3		19	7	3
32	19	6	3		23	7	4		25	7	4			32	16	6	3		19	7	3		21	8	4			32	18	6	3		21	6	4		25	7	4			32	14	5	3		18	6	3
33	3	2	2		4	3	2		6	4	2			33	33	10	5		35	11	5		36	11	5			33	21	6	4		25	7	4		31	8	5			33	13	5	3		16	6	3
34	18	7	3		19	7	3		22	8	4			34	0.9	1.2	1		1	2	2		2	2	2			34	15	5	3		17	6	3		19	7	3			34	17	5	3		21	6	4
35	17	6	3		19	6	3		23	6	4			35	24	8	4		26	8	4		29	9	4			35	31	8	5		34	9	5		36	9	5			35	9	4	2		12	5	3
36	36	9	5		38	9	5		42	10	6			36	24	10	4		25	10	4		29	11	4			36	19	7	3		23	8	4		27	9	4			36	0.5	5	2		*	*	*
37	47	10	6		48	10	6		50	11	6			37	30	9	4		32	10	5		35	10	5			37	18	8	3		20	9	3		23	9	4			37	19	6	2		23	7	4
38	0.9	2	1		3	5	2		*	*	*			38	21	7	4		24	8	4		26	8	4			38	28	9	4		31	10	5		35	10	5			38	0.6	7	2		*	*	*
39	14	6	3		17	6	3		18	6	3			39	28	8	4		31	8	5		35	9	5			39	20	6	3		25	7	4		28	8	4			39	18	7	3		21	8	4
40	16	7	3		17	8	3		20	8	3			40	14	5	3		19	6	3		23	7	4			40	23	8	4		26	9	4		28	9	4			40	17	6	3		21	7	4
41	14	5	3		18	6	3		20	7	3			41	19	6	3		21	7	4		25	8	4			41	26	7	4		29	8	4		31	8	5			41	36	9	5		37	9	5
42	18	6	3		22	7	4		25	7	4			42	24	7	4		26	7	4		29	8	4			42	18	6	3		22	7	4		24	8	4			42	43	10	6		43	10	6
43	5	3	2		7	4	2		9	4	2			43	23	7	4		26	8	4		31	9	5			43	21	8	4		25	9	4		29	10	4			43	9	4	2		12	5	3
44	48	10	6		49	11	6		50	11	6			44	26	7	4		29	8	4		33	9	5			44	22	8	4		25	9	4		29	10	4			44	0.8	1	1		1	1	2
45	12	3	3		13	4	3		16	5	3			45	19	7	3		21	7	4		25	8	4			45	23	6	4		24	6	4		27	7	4			45	16	7	3		19	8	3
46	15	4	3		17	5	3		21	7	4			46	23	7	4		27	8	4		29	8	4			46	16	4	3		*	*	*		*	*	*			46	14	5	3		17	6	3
47	43	10	6		44	11	6		46	11	6			47	25	8	4		27	9	4		29	9	4			47	25	8	4		28	9	4		32	10	5			47	18	6	3		21	7	4
48	11	4	3		*	*	*		*	*	*			48	15	6	3		18	7	3		21	8	4			48	26	10	4		28	10	4		31	11	5			48	24	8	4		27	9	4
49	0.8	2	1		1.9	3	2		*	*	*			49	20	8	3		22	8	4		27	9	4			49	19	6	3		22	7	4		35	8	5			49	18	6	3		21	7	4
50	16	7	3		18	7	3		22	8	4			50	20	8	3		23	9	4		26	10	4			50	25	10	4		29	11	4		32	11	5			50	43	10	6		43	10	6
51	33	9	5		35	10	5		39	10	5			51	27	9	4		30	10	4		32	10	5			51	26	9	4		28	9	4		31	10	5			51	12	3	3		15	4	3
52	6	2	2		7	2	2		9	3	2			52	16	7	3		19	8	3		23	9	4			52	18	6	3		22	7	4		25	8	4			52	15	4	3		19	5	3
53	11	3	3		14	4	3		16	4	3			53	16	7	3		*	*	*		*	*	*			53	22	9	4		25	10	4		29	10	4			53	43	10	6		44	11	6
54	26	7	4		27	7	4		29	7	4			54	17	6	3		19	7	3		23	8	4			54	26	10	4		*	*	*		*	*	*			54	0.8	1	1		1	1	2
55	12	4	3		14	5	3		*	*	*			55	26	8	4		28	9	4		29	9	4			55	11	3	3		14	4	3		17	5	3			55	11	4	3		15	5	3
56	18	6	3		21	7	4		23	7	4			56	30	11	3		33	11	5		35	11	5			56	21	7	4		24	8	4		27	9	4			56	16	5	3		19	6	3
57	16	6	3		19	7	3		24	8	4			57	29	10	4		32	11	5		35	11	5			57	0.9	1	1		2	2	2		4	3	2			57	21	7	4		25	8	4
58	21	6	4		24	7	4		26	7	4			58	19	7	3		22	8	4		25	8	4			58	19	7	3		22	7	4		26	8	4			58	28	9	4		31	9	5
59	33	10	5		35	10	5		39	10	5			59	26	9	4		29	10	4		34	11	5			59	18	7	3		22	8	4		25	8	4			59	13	4	3		16	5	3
60	15	5	3		19	6	3		22	6	4			60	21	8	4		23	8	4		27	9	4			60	27	10	4		30	10	4		32	11	5			60	13	4	3		15	4	3
61	31	8	5		36	9	5		38	9	5			61	15	6	3		18	7	3		21	8	4			61	17	6	3		21	7	4		25	7	4			61	35	11	5		37	12	5
62	24	8	4		27	8	4		30	9	4			62	14	4	3		17	5	3		19	6	3			62	25	10	4		28	10	4		30	11	4			62	11	5	3		15	6	3
63	19	7	3		22	8	4		26	8	4			63	27	10	4		31	11	5		33	11	5			63	0.8	5	1		*	*	*		*	*	*			63	19	8	3		23	8	4
64	18	8	3		22	9	4		24	9	4			64	37	11	5		40	12	5		43	12	6			64	0.5	10	1		*	*	*		*	*	*			64	24	9	4		27	9	4
65	30	9	4		33	10	5		35	11	5			65	18	6	3		21	7	4		25	8	4			65	19	6	3		23	7	4		28	8	4			65	33	11	5		37	12	5
66	28	9	4		31	10	5		35	10	5			66	27	8	4		29	8	4		32	9	5			66	31	10	5		35	11	5		37	11	5			66	25	6	4		28	7	4
67	21	7	4		23	8	4		24	8	4			67	17	6	3		20	7	3		22	7	4			67	19	6	3		22	7	4		25	8	4			67	26	8	4		29	9	4
68	0.5	1	1	1	1	1	2		*	*	*			68	27	9	4		29	9	4		32	10	5			68	0.7	1	1		1	1	2		2	2	2			68	29	10	4		34	11	5
69	23	8	4		25	8	4		26	8	4			69	16	5	3		19	6	3		22	7	4			69	15	6	3		17	6	3		19	7	3								0.8	1	1
70	14	5	3		17	5	3		19	6	3			70	14	6	3		17	7	3		19	8	3			70	25	8	4		28	9	4		29	9	4								0.5	1	1
71	26	7	4		27	7	4		31	8	5			71	21	7	4		24	8	4		28	9	4			71	16	5	3		19	6	3		23	7	4
72	19	6	3		22	7	4		24	7	4			72	13	4	3		17	5	3		19	6	3			72	28	9	4		29	9	4		31	10	5
73	18	6	3		19	6	3		22	7	4			73	35	12	5		37	12	5		38	12	5			73	13	4	3		18	5	3		21	6	4
74	4	2	2		6	3	2		9	5	2			74	19	8	3		21	8	4		24	9	4			74	11	6	3		15	7	3		19	8	3				68				67
75	21	8	4		25	9	4		28	9	4			75	33	11	3		35	12	5		36	12	5			75	24	9	4		27	10	4		29	10	4
76	23	7	4		27	8	4		29	8	4			76	26	8	4		29	8	4		32	9	5			76	25	6	4		28	7	4		30	8	4
77	22	8	4		25	8	4		28	9	4			77	26	6	4		28	7	4		32	8	5			77	29	10	4		33	11	5		37	12	5
78	26	7	4		29	8	4		31	8	5			78	12	6	3		15	7	3		19	8	3			78	45	10	6		47	11	6		48	11	6
79	23	6	4		27	7	4		30	8	4			79	18	7	3		21	7	4		24	8	4			79	14	6	3		17	7	3		20	8	3
80	19	7	3		22	7	4		27	8	4			80	20	8	3		23	9	4		25	9	4			80	0.8	1	1		2	2	2		3	3	2
81	16	4	3		19	5	3		25	6	4			81	17	7	3		20	8	3		22	8	4			81	24	8	4		26	8	4		29	9	4
82	23	7	4		25	7	4		28	8	4			82	21	7	4		24	8	4		26	9	4			82	45	10	6		46	10	6		48	11	6
83	25	8	4		27	8	4		31	9	5			83	32	9	5		34	10	5		37	10	5			83	23	8	4		26	9	4		28	9	4
84	25	8	4		26	8	4		28	9	4			84	40	10	5		41	10	6		43	10	6			84	23	7	4		26	8	4		30	9	4
85	0.7	1	1		*	*	*		*	*	*			85	14	6	3		18	7	3		22	8	4			85	26	7	4		28	8	4		31	8	5
86	15	6	3		19	7	3		22	8	4			86	16	6	3		19	7	3		22	8	4			86	19	7	3		23	8	4		27	9	4
87	19	6	3		23	7	4		26	8	4			87	25	9	4		28	9	4		31	10	5			87	12	4	3		16	5	3		19	6	3
88	20	8	3		25	9	4		27	9	4			88	28	9	4		31	10	5		33	10	5			88	0.6	1	1		1	1	2		2	2	2
89	25	10	4		27	10	4		31	10	5			89	12	4	3		16	5	3		19	6	3			89	16	6	3		18	6	3		21	7	4
90	20	8	3		24	9	4		27	10	4			90	43	9	6		44	9	6		45	10	6			90	23	7	4		26	8	4		29	9	4
91	26	9	4		29	10	4		31	10	5			91	10	4	2		13	5	3		17	6	3			91	33	10	5		35	11	5		38	11	5
92	27	9	4		29	9	4		33	10	5			92	14	5	3		17	6	3		19	7	3			92	24	7	4		27	8	4		28	8	4
93	18	6	3		24	7	4		27	7	4			93	17	5	3		19	6	3		23	7	4			93	24	8	4		26	9	4		27	9	4
94	16	7	3		19	8	3		21	9	4			94	14	5	3		17	6	3		20	7	3			94	19	6	3		23	7	4		25	7	4
95	22	9	4		27	10	4		29	10	4			95	18	7	3		20	7	3		23	8	4			95	24	8	4		28	9	4		32	9	5
96	16	7	3		18	8	3		23	9	4			96	17	6	3		20	7	3		22	7	4			96	14	5	3		17	6	3		21	7	4
97	26	10	4		28	10	4		32	11	5								0.5	0.9	1		1	1	2			97	24	10	4		28	11	4		32	11	5
98	17	6	3		19	7	3		23	8	4								0.6	0.9	1		1.5	2	2			98	28	8	4		31	9	5		34	9	5
99	11	3	3		*	*	*		*	*	*								0.9	1	1		2	2	2			99	30	9	4		32	9	5		36	10	5
100	26	8	4		28	8	4		31	9	5								0.5	0.9	1		*	*	*			100	21	7	4		24	8	4		29	9	4
101	21	7	4		25	8	4		28	9	4								0.5	0.9	1		*	*	*			101	16	7	3		19	8	3		21	8	4
102	30	11	4		33	11	5		36	11	5																	102	11	4	3		14	5	3		18	6	3
103	28	7	4		31	8	5		33	8	5				96				95				93					103	15	4	3		17	5	3		19	6	3
104	29	10	4		34	11	5		36	11	5																	104	25	8	4		28	9	4		32	9	5
105	19	7	3		25	8	4		28	8	4																	105	15	6	3		17	7	3		20	7	3
106	0.8	1	1		1	2	2		2	3	2																	106	20	8	3		23	9	4		24	9	4
107	18	7	3		19	7	3		23	8	4																	107	0.9	1	1		1	1	2		2	2	2
108	26	9	4		29	10	4		31	10	5																	108	27	9	4		31	10	5		32	10	5
109	27	10	4		28	10	4		29	10	4																	109	16	7	3		18	7	3		21	8	4
110	21	8	4		25	9	4		29	9	4																	110	16	7	3		19	8	3		22	8	4
111	17	6	3		21	7	4		24	8	4																	111	17	6	3		21	7	4		23	8	4
112	15	6	3		18	7	3		19	7	3																	112	27	8	4		31	9	5		35	10	5
113	25	10	4		27	11	4		30	11	4																	113	26	8	4		29	9	4		34	10	5
114	14	4	3		17	5	3		21	6	4																	114	17	6	3		19	7	3		23	8	4
115	6	3	2		7	3	2		9	4	2																	115	30	11	4		32	11	5		35	12	5
116	27	10	4		29	10	4		33	11	5																	116	27	9	4		31	10	5		35	11	5
117	26	10	4		29	11	4		31	11	5																	117	29	10	4		34	11	5		37	11	5
118	37	11	5		38	11	5		41	11	6																	118	0.7	5	1		*	*	*		*	*	*
119	19	6	3		22	7	4		25	8	4																	119	19	7	3		22	8	4		24	8	4
120	18	6	3		22	7	4		23	7	4																	120	14	6	3		17	7	3		19	7	3
121	31	10	5		35	11	5		37	11	5																	121	26	9	4		29	10	4		33	10	5
122	27	8	4		30	9	4		32	9	5																	122	26	8	4		28	8	4		34	9	5
123	0.9	1	1		2	2	2		3	3	2																	123	21	8	4		26	9	4		29	10	4
124	17	6	3		19	6	3		22	7	4																	124	33	11	5		35	11	5		39	11	5
125	19	6	3		23	7	4		25	7	4																	125	15	6	3		17	7	3		19	7	3
126	27	9	4		29	9	4		34	10	5																	126	19	8	3		22	9	4		25	9	4
127	15	6	3		18	7	3		21	7	4																	127	14	4	3		18	5	3		24	6	4
128	16	5	3		18	5	3		22	6	4																	128	35	12	5		39	12	5		42	12	6
129	25	8	4		29	9	4		31	9	5																	129	27	10	4		31	11	5		35	11	5
130	14	6	3		18	7	3		21	7	4																	130	13	4	3		17	5	3		19	6	3
131	16	5	3		18	5	3		23	6	4																	131	37	11	5		40	12	5		42	12	6
132	21	7	4		25	8	4		27	9	4																	132	21	7	4		25	8	4		29	9	4
133	28	9	4		33	10	5		36	10	5																	133	18	6	3		23	7	4		26	8	4
134	13	4	3		17	5	3		19	5	3																						0.6	1	1		1	1	1
135	13	4	3		15	4	3		18	5	3																						0.6	1	1		1.9	1	2
136	35	12	5		39	12	5		43	12	6																										0.5	1	1
137	11	6	3		15	7	3		18	7	3																										0.6	1	1
138	19	8	3		24	9	4		25	9	4																										0.9	1	1
139	24	9	4		26	9	4		29	10	4
140	33	11	5		34	11	5		37	12	5																		133				128				131
141	25	6	4		29	7	4		32	7	5
142	26	8	4		29	9	4		31	9	5
143	29	10	4		32	10	5		35	11	5
144					0.9	1	1		2	2	2
145					0.6	1	1		*	*	*
146					0.8	1.5	1		2	2	2
147					0.5	1.5	1		1	2	2
148									0.9	2	1
149									0.5	1.5	1
150									0.5	2	1
	143				141				139

## Sheet: Otates
Plot 1														Plot 2														Plot 3														Plot 4
	2016-11-01				2017-11-01				2018-11-01						2016-11-01				2017-11-01				2018-11-01						2016-11-01				2017-11-01				2018-11-01						2016-11-01				2017-11-01
No.	DAP	ALT	CD		DAP	ALT	CD		DAP	ALT	CD			No.	DAP	ALT	CD		DAP	ALT	CD		DAP	ALT	CD			No.	DAP	ALT	CD		DAP	ALT	CD		DAP	ALT	CD			No.	DAP	ALT	CD		DAP	ALT	CD
1	11.5	5	3		12.5	6	3		13	6	3			1	12	6	3		12.5	6	3		13	6	3			1	15	5	3		16	5	3		17	6	3			1	14.5	6	3		15	6	3
2	9	5	2		9.5	5	2		10	6	2			2	12	6	3		12.5	6	3		13	6	3			2	35	11	5		37	12	5		38	12	5			2	15	6	3		16	6	3
3	15	6	3		15	6	3		17	6	3			3	14	6	3		14.5	6	3		15	6	3			3	34	11	5		34	11	5		35	11	5			3	9.5	4	2		10	4	2
4	17	8	3		17	8	3		17.5	8	3			4	9	5	2		9.5	5	2		10	5	2			4	14	5	3		14	5	3		*	*	*			4	8.5	4	2		9	4	2
5	13	6	3		13	6	3		14	7	3			5	12.5	6	3		13	6	3		14	7	3			5	11	5	3		11.5	5	3		12	5	3			5	9.5	4	2		9.5	4	2
6	11	5	3		11	5	3		11.5	5	3			6	5	5	2		5	5	2		6	5	2			6	24	7	4		24.5	7	4		25	7	4			6	10	5	2		11	5	3
7	16	6	3		16.5	6	3		17	7	3			7	10.5	6	3		10.5	6	3		11	6	3			7	27	7	4		28	7	4		29	8	4			7	11	5	3		12	5	3
8	9.5	5	2		10.5	5	3		11	6	3			8	9.5	7	2		10	7	2		11	8	3			8	12	5	3		12.5	5	3		13	5	3			8	15.5	8	3		*	*	*
9	16	9	3		17.5	9	3		18	10	3			9	8	4	2		8.5	4	2		9	4	2			9	28	11	4		28.5	11	4		29	11	4			9	14	7	3		15.5	8	3
10	13	8	3		15	9	3		16	9	3			10	12.5	7	3		14	8	3		15	8	3			10	25	7	4		26.5	7	4		28	8	4			10	15.5	6	3		16.5	6	3
11	14	8	3		14.5	8	3		15	8	3			11	10	6	2		11.5	7	3		12.5	7	3			11	8	6	2		8.5	6	2		9	6	2			11	12	5	3		12.5	5	3
12	10	6	2		11	6	3		12	7	3			12	7.5	5	2		8	5	2		9	6	2			12	17	7	3		17.5	7	3		18	7	3			12	17	6	3		18.5	7	3
13	10	5	2		12.5	6	3		13	6	3			13	10	4	2		10	4	2		10.5	5	3			13	14	6	3		14.5	6	3		15	6	3			13	13	6	3		14	6	3
14	9	4	2		9.5	5	2		10	5	2			14	5	3	2		6	3	2		7	4	2			14	16	7	3		17	7	3		18	8	3			14	15	6	3		15.5	6	3
15	13	7	3		15	8	3		16	8	3			15	6	2	2		7	3	2		7	3	2			15	15	6	3		17	7	3		18	7	3			15	9.5	4	2		10	4	2
16	21	9	4		22	9	4		22.5	10	4			16	8	4	2		9	4	2		9.5	4	2			16	16	6	3		16.5	6	3		17	6	3			16	9	4	2		9.5	4	2
17	14	5	3		15.5	6	3		16.5	6	3			17	10.5	7	3		11.5	7	3		*	*	*			17	6.5	3	2		7	3	2		8	4	2			17	7	3	2		7	3	2
18	22	8	4		23.5	9	4		24	9	4			18	9	6	2		10	6	2		11	7	3			18	21	7	4		*	*	*		*	*	*			18	18	6	3		18	6	3
19	8	4	2		8.5	4	2		9	4	2			19	14	7	3		16	8	3		17	8	3			19	14	5	3		15	6	3		16	6	3			19	10.5	5	3		11	5	3
20	16	6	3		17.5	7	3		18	7	3			20	18.5	8	3		19	9	3		20	9	3			20	14	6	3		15	6	3		15.5	6	3			20	10	5	2		10	5	2
21	12	5	3		13	5	3		13.5	5	3			21	8.5	6	2		10	6	2		11	6	3			21	15	6	3		17	7	3		18	7	3			21	14	7	3		15	7	3
22	15	6	3		15.5	6	3		16	6	3			22	7.5	5	2		8.5	5	2		9	5	2			22	15	6	3		15	6	3		16	6	3			22	12	6	3		13	6	3
23	12	5	3		12.5	5	3		13	5	3			23	13	5	3		13.5	5	3		14	5	3			23	20	5	3		21	6	4		21	6	4			23	12	6	3		12	6	3
24	13	7	3		14	8	3		14	8	3			24	14	5	3		15	5	3		16	5	3			24	0.3	0.5	1		*	*	*		*	*	*			24	11	6	3		11	6	3
25	16	7	3		16	7	3		17	7	3			25	9.5	5	2		*	*	*		*	*	*			25	0.3	0.5	1		*	*	*		*	*	*			25	12	6	3		12	6	3
26	19	8	3		21.5	9	4		22	9	4			26	9.5	5	2		9.5	5	2		10	5	2			26	0.3	0.5	1		*	*	*		*	*	*			26	12	6	3		12	6	3
27	8	3	2		8	3	2		9	4	2			27	8.5	5	2		8.5	5	2		9	6	2			27	0.3	0.5	1		0.5	1	1		1	1	2			27	13	6	3		13	6	3
28	12	5	3		13	6	3		15	6	3			28	6.5	5	2		8	6	2		9	6	2			28	0.5	0.5	1		1	1	2		1.5	1	2			28	12	6	3		13	6	3
29	20	7	3		20.5	7	4		21	7	4			29	7.5	4	2		7.5	4	2		8	5	2			29	0.3	0.5	1		*	*	*		*	*	*			29	11	4	3		12	4	3
30	9	4	2		9.5	5	2		10	5	2			30	8	4	2		9	5	2		*	*	*			30	0.3	0.5	1		0.5	*	1		*	*	*			30	13	5	3		13.5	5	3
31	14	5	3		15.5	6	3		16.5	6	3			31	10	4	2		10.5	5	3		11	5	3			31	0.3	0.5	1		0.5	0.9	1		0.8	1	1			31	14	5	3		15.5	6	3
32	15	4	3		15	4	3		16	5	3			32	5	5	2		7.5	6	2		8	6	2			32	0.3	0.5	1		0.6	0.9	1		0.9	1	1			32	11	4	3		11.5	4	3
33	0.9	1	1		*	*	*		*	*	*			33	10.5	5	3		11	5	3		12	6	3			33	0.9	0.9	1		1	1	2		1.5	2	2			33	13	4	3		15	5	3
34	0.4	0.7	1		*	*	*		*	*	*			34	10	4	2		*	*	*		*	*	*			34	0.4	0.5	1		0.8	1	1		1	1	2			34	14	3	3		15	3	3
35	0.5	0.7	1		0.8	1	1		1	1	2			35	10	6	2		11.5	6	3		12	7	3			35	0.3	0.5	1		0.6	0.9	1		1	1	2			35	9.5	4	2		10.5	4	3
36	0.6	0.9	1		0.85	1	1		1	1	2			36	8.5	6	2		10	7	2		11	7	3			36	0.3	0.5	1		0.5	0.9	1		1	1	2			36	13	5	3		13.5	5	3
37	0.4	0.8	1		0.6	1	1		1	1	2			37	9	5	2		10	6	2		10.5	6	3			37	0.2	0.5	1		*	*	*		*	*	*			37	8	3	2		10	4	2
38	0.3	0.7	1		*	*	*		*	*	*			38	9	5	2		9.5	5	2		10	6	2			38	0.2	0.5	1		*	*	*		*	*	*			38	10	4	2		13	5	3
39	0.3	0.8	1		*	*	*		*	*	*			39	9	5	2		9	5	2		10	5	2			39	0.2	0.5	1		0.5	0.9	1		1	1	2			39	14	7	3		15.5	8	3
40	0.9	1	1		1	1	2		1.5	2	2			40	17.5	5	3		19	6	3		20	6	2			40	1.3	1	2		1.8	2	2		2	2	2			40	9	5	2		10	5	2
41	0.8	1	1		1	1	2		1.5	2	2			41	14.5	4	3		15.5	5	3		16	5	3			41	1.4	1	2		1.6	2	2		2	2	2			41	12	5	3		13	5	3
42	0.9	1	1		1.5	1	2		2	2	2			42	14	8	3		14.5	8	3		16.5	9	3			42	1.5	1	2		1.6	2	2		2	2	2			42	8	4	2		8.5	4	2
43	0.8	1	1		1.5	1	2		2	2	2			43	18.5	5	3		19.5	6	3		20	6	3			43	1.5	1	2		1.5	2	2		2	2	2			43	10	5	2		10.5	5	3
44	0.4	0.8	1		0.6	1	1		1	1.5	2			44	10.5	5	3		11.5	5	3		12	6	3			44	1.3	1	2		*	*	*		*	*	*			44	9	4	2		9	4	2
45	0.5	0.9	1		1	1	2		1.5	2	2			45	7	5	2		8	5	2		8.5	5	2			45	0.8	0.5	1		1	1	2		1.5	2	2			45	8	4	2		8.5	4	2
46	0.8	1	1		1	1	2		1.5	2	2			46	9	8	2		9	8	2		10	8	2			46	1.2	1	2		*	*	*		*	*	*			46	19	7	3		20	7	3
47	0.5	0.9	1		0.9	1	1		1.5	2	2			47	6.5	5	2		7	5	2		8	6	2			47	0.6	0.5	1		0.8	1	1		1	1	2			47	12	7	3		12.5	7	3
48	0.5	0.9	1						0.5	1	1			48	11	4	3		11	4	3		11.5	4	3			48	0.5	0.5	1		0.9	1	1		1.5	2	2			48	14	6	3		15.5	7	3
49	0.6	0.8	1						0.8	1	1			49	7.5	5	2		9	6	2		10.5	6	3			49	0.3	0.5	1		0.6	1	1		1	1	2			49	13	6	3		14	6	3
									0.5	1	1			50	6.5	4	2		6.5	4	2		7	4	2			50	0.5	0.5	1		0.8	1	1		1	1	2			50	15	7	3		16	7	3
									0.5	1	1			51	6	4	2		7	4	2		7.5	5	2								0.5	0.9	1		0.5	1	1			51	10	6	2		11	6	3
														52	6	4	2		9	5	2		*	*	*								0.8	1	1		0.5	1	1			52	10	5	2		10.5	5	3
	49				43				47					53	6	3	2		8	4	2		8.5	4	2								0.9	1	1		0.9	1	1			53	12	5	3		13	5	3
														54	7	3	2		8	4	2		8.5	4	2								0.9	1	1		0.5	1	1			54	18	6	3		20	7	3
														55	8	4	2		12	5	3		13	5	3												0.5	1	1			55	20	7	3		21	8	4
														56	0.8	3	1		*	*	*		*	*	*												0.5	1	1			56	12	5	3		12.5	5	3
														57	1	4	2		1.4	2	3		2	2	5																	57	0.4	0.8	1		0.7	1	1
														58	2	3	3		2.5	3	5		3	3	6				50				45				45					58	0.3	0.8	1		0.7	1	1
														59	0.8	1	2		1	1	3		1.5	1	3																	59	0.3	0.8	1		0.7	1	1
														60	1.5	2	2		1.6	2	3		2	2	4																	60	0.3	0.8	1		0.5	1	1
														61	1.6	2	2		1.6	2	3		2	2	3																	61	0.3	0.8	1		0.4	1	1
														62	1.5	2	2		2	2	4		2	2	3																	62	0.3	0.8	1		*	*	*
														63	1.5	2	2		2.5	2	5		3	2	5																	63	0.3	0.8	1		*	*	*
														64	0.5	1	2		0.8	1	2		1	1	3																	64	0.3	0.8	1		0.7	1	1
														65	1	1	3		1.9	2	3		2	2	4																	65	0.4	0.8	1		0.9	1	1
														66	0.9	1	3		1.3	1	2		1.5	1	3																	66	0.4	0.8	1		*	*	*
														67	0.8	1	2		1.25	1	2		1.5	1	2																	67	0.4	0.8	1		0.6	1	1
														68	0.4	1	2		0.75	1	2		1	1	2																	68	0.4	0.8	1		0.5	1	1
														69	0.3	1	2		0.6	1	1		1	1	2																	69	0.4	0.8	1		0.7	1	1
														70	0.5	0.7	1		0.7	1	1		1	1	2																	70	0.5	0.8	1		1	1	2
														71	0.3	0.7	1		0.5	1	1		1	1	2																	71	0.3	0.8	1		0.5	1	1
														72	0.5	1	1		0.7	1	1		1	1	2																	72	0.3	0.8	1		0.7	1	1
														73	0.4	0.8	1		0.5	1	1		*	*	*																	73	0.5	0.8	1		0.7	1	1
														74	0.4	0.8	1		0.5	1	1		1	1	2																	74	0.3	0.8	1		*	*	*
														75	1	1	2		1.5	1	2		2	1	2																	75	0.3	0.8	1		0.8	1	1
														76	0.9	1	1		1.5	1	2		2	1	2																	76	0.3	0.8	1		0.7	1	1
														77	0.9	1	1		1.3	1	2		1.5	1	2																	77	0.3	0.8	1		0.8	1	1
														78	0.9	1	1		1.3	1	2		2	1	2																	78	0.4	0.8	1		0.9	1	1
														79	1.2	1.5	2		1.5	1	2		2	1	2																	79	0.4	0.8	1		0.7	1	1
														80	0.9	1	1		1.45	1	2		2	1	2																	80	0.5	0.8	1		0.5	1	1
														81	1.2	1	2		1.5	1	2		2	1	2																	81	0.5	0.8	1		0.7	1	1
														82	1	1	2		1.1	1	2		1.5	1	2																	82	0.3	0.8	1		0.7	1	1
														83	0.4	1	1		0.7	1	1		1	1	2																	83	0.4	0.8	1		0.5	1	1
														84	0.6	1	1		0.6	1	1		1	1	2																	84	0.4	0.8	1		0.5	1	1
														85	0.7	1	1		0.9	1	1		1.5	1	2																	85	0.5	0.8	1		0.7	1	1
														86	0.9	1	1		1.2	1.2	2		1.5	2	2																	86	0.4	0.8	1		0.7	1	1
														87	0.7	1	1		1.4	1.2	2		2	2	2																	87	0.5	0.8	1		0.8	1	1
														88	0.5	1	1		0.5	1	1		1	1	2																	88	0.5	0.8	1		0.7	1	1
														89	0.4	1	1		0.5	1	1		1	1	2																	89	0.5	0.8	1		0.7	1	1
														90	0.4	1	1		0.5	1	1		1	1	2																	90	0.5	0.8	1		0.8	1	1
														91	0.6	1	1		1	1.2	2		1.5	2	2																	91	0.5	0.8	1		0.6	1	1
														92	0.5	1	1		0.8	1	1		1	1	2																	92	0.4	0.8	1		0.5	1	1
														93	0.6	1	1		0.6	1	1		1	1	2																	93	0.4	0.8	1		0.5	1	1
														94	0.3	1	1		0.6	1	1		1	1	2																	94	0.4	0.8	1		0.6	1	1
														95	0.4	0.7	1		0.5	0.9	1		1	1	2																	95	0.4	0.8	1		0.6	1	1
														96	0.4	0.7	1		0.6	0.9	1		1	1	2																	96	0.4	0.8	1		0.5	1	1
														97	0.3	0.8	1		0.5	0.9	1		1	1	2																	97	0.4	0.8	1		0.5	1	1
														98	0.5	1	1		0.8	1	1		1.5	1	2																	98	0.4	0.8	1		*	*	*
														99	0.4	1	1		0.7	1	1		1	1	2																	99	0.4	0.8	1		*	*	*
														100	0.3	0.6	1		0.6	0.8	1		1	1	2																	100	0.3	0.8	1		*	*	*
														101	1	1	2		1.2	1	2		1.5	2	2																	101	0.3	0.8	1		0.8	1	1
														102	1	1	2		1.4	1	2		2	2	2																	102	0.4	0.8	1		0.8	1	1
														103	0.4	0.8	1		0.6	8	1		1	1	2																	103	0.4	0.8	1		0.8	1	1
																			0.8	1	1		*	*	*																						0.5	0.9	1
																			0.5	1	1		1	1	2																						0.6	0.9	1
																			0.8	1	1		1	1	2																						0.6	1	1
																			0.8	1	1		1	1	2																						0.5	0.9	1
																							0.5	0.9	1																						0.5	0.9	1
																							0.7	1	1
															103				104				101
																																											103				100
